# Supplementary material for: Households neighboring wildlife protected areas may be at a higher risk of rabies than those located further away: a community-based cross-sectional cohort study at Pian Upe game reserve, Bukedea district, Eastern Uganda
Source: Frontiers journal article supplement (doi:10.3389/fitd.2024.1272141), 2024-04-22

# Rabies: Prevalence & KAPs Project at Wild-life Animal Human Interface (KAPs-WAH)

## Questionnaire Identification

A1 Questionnaire ID:

---

A1.1 Name of enumerator

*Put your initials say for TM: meaning Taremwa Martha*

---

A2 District name

- ☐ Nwoya
- ☐ Kamwengye
- ☐ Bukedea
- ☐ Other

A3 Sub-county name:

- ☐ Anaka
- ☐ Purongo
- ☐ Lii
- ☐ Got Apwoyo
- ☐ Koch Goma
- ☐ Alero
- ☐ Lungulu
- ☐ Kochgoma TC

A4.1 Parish name\_anaka

- ☐ Todora
- ☐ Pabali
- ☐ Ywaya
- ☐ Pangora
- ☐ Other

**A4.2 Parish name\_purongo**

- ☐ Pawatomero
- ☐ Pabit
- ☐ Patira
- ☐ Paromo
- ☐ Other

**A4.3 Parish name\_Lii**

- ☐ Orum
- ☐ Lutuk
- ☐ Langele
- ☐ Lii
- ☐ Other

**A4.4 Parish name\_Got Apwoyo**

- ☐ Barlyec
- ☐ Tegot
- ☐ Paminolango
- ☐ Obira
- ☐ Other

**A4.5 Parish name\_Koch Goma**

- ☐ Kal
- ☐ Agonga
- ☐ Coorom
- ☐ Amar
- ☐ Other

**A4.6 Parish name\_Alero**

- ☐ Bwobonam
- ☐ Okura
- ☐ Kal
- ☐ Panyabono
- ☐ Other

**A4.7 Parish name\_Lungulu**

- ☐ Panokrac
- ☐ Barjere
- ☐ Labngech
- ☐ Lulunwen
- ☐ Nomukino
- ☐ other

**A4.8 Parish name\_Koch Goma TC**

- ☐ Panokrac
- ☐ Barjere
- ☐ Labngech
- ☐ Lulunwen
- ☐ Nomukino
- ☐ other

**A5 Village Name:**

---

**A6 location of the village-Ecological**

- ☐ near anational park
- ☐ away from a national park
- ☐ with in the national park

**A7 Location of village**

- ☐ Rural
- ☐ Urban
- ☐ Semi-rural
- ☐ Semi-urban

**A7a Are you house hold head?**

- ☐ yes
- ☐ no

**A7bOther than HHH, who are you**

- ☐ Son
- ☐ Daughter
- ☐ Wife
- ☐ Brother
- ☐ Sister
- ☐ Other

**A8Name of House Hold head (HHH)**

---

**A9Cell phone contact of house hold head**

---

**Socio-demographic characteristics of study participants****s1age in completed years**

---

**s2Sex**

- ☐ Male
- ☐ Female

**s3Level of education**

- ☐ none
- ☐ primary
- ☐ secondary
- ☐ tertiary but university
- ☐ university

**s4religion**

- ☐ anglican
- ☐ catholic
- ☐ muslim
- ☐ SDA
- ☐ born again
- ☐ other

**s5other religion**

---

**s6tribe**

- ☐ Itesot
- ☐ Acholi
- ☐ Lango
- ☐ mutooro
- ☐ K`ajong
- ☐ mukiga
- ☐ munyankole
- ☐ muhima
- ☐ other

**s7other tribe**

---

**s7Marital status**

- ☐ Married
- ☐ Divorced
- ☐ Widowed
- ☐ Single
- ☐ Other

**s8Other marital status**

---

**s8.1if other marital status, specify**

---

**s9Smoke**

- ☐ no
- ☐ yes

**s10How many cigars per day**

---

**s11Alcohol consumption**

- ☐ no
- ☐ yes

**s12Which type of alcohol**

- ☐ Waragi
- ☐ Beer
- ☐ Toonto
- ☐ ajono
- ☐ other

**s14Amount of alcohol you consume daily in litres**

---

**» Group****» » Risk factors for Rabies at Wild life -Animal- Human interface****R1Who fetches fire wood**

- ☐ Husband
- ☐ Wife
- ☐ Children
- ☐ Other

**R2Do you obtain firewood from Game reserve/National park**

- ☐ Yes
- ☐ No

**R3Distance from firewood source in kms**

---

**R4Who fetches water?**

- ☐ husband/father
- ☐ mother
- ☐ children
- ☐ other

**R5Do you obtain water from Game reserve /national park?**

- ☐ Yes
- ☐ No

**R6Distance from water source kms?**

---

**R7Are there stray dogs that frequent this household/homestead**

- ☐ yes
- ☐ no

**R8Are the stray dogs vaccinated ?**

- ☐ yes
- ☐ no
- ☐ I don't know

**R9Do you own dogs in this household**

- ☐ yes
- ☐ no

**R10If yes, how many dogs**

---

**R10.1 Where do you often get your dogs**

- ☐ Get them for free from friend/neighbor/family
- ☐ buy from neighbour
- ☐ buy from another sub-country
- ☐ buy from another district
- ☐ I pick them from the bush/wild
- ☐ I pick homeless dogs
- ☐ buy from another country
- ☐ inherited from parents
- ☐ any other source

**R11if other source, specify**

---

**R12Are your dogs vaccinated against rabies**

- ☐ yes
- ☐ no
- ☐ i don't know

**R13how long time ago (months) did they receive the last shot of rabies**

---

**R14Are your dogs used for hunting**

- ☐ Yes
- ☐ No

**R15How many times do you hunt per month**

---

**R16Do you hunt from game reserve/national park**

- ☐ yes
- ☐ no
- ☐ other hunting place

**R17if other hunting place, which one**

---

**R18Which animals do you have**

- ☐ cattle
- ☐ sheep
- ☐ goats
- ☐ pigs
- ☐ monkeys
- ☐ other

**R19if you have other animals, what are they**

---

**R20Are there straying wild animals in this community**

- ☐ yes
- ☐ no

**R21If yes for straying animals, what are they**

- ☐ leopards
- ☐ lion
- ☐ cheetah
- ☐ foxes
- ☐ elephants
- ☐ monkeys
- ☐ other

**R21if other, which one**

---

**R20Do you graze animals in the game reserve/national park?**

- ☐ yes
- ☐ no

**R22Do you own wild animals**

- ☐ yes
- ☐ no

**R23Which wild animals do you own**

- ☐ foxes
- ☐ monkeys
- ☐ other

**R24if own other wild animals, which ones**

---

**R25Are these wild animals vaccinated**

- ☐ No
- ☐ Yes
- ☐ i dont know

**R26Which wild animals normally interact with your dogs/or come in your community**

- ☐ jackals
- ☐ bats
- ☐ wild cats
- ☐ monkeys
- ☐ foxes
- ☐ other

**R27if other wild animals, specify**

---

**Prevalence factors: Biological determinants****P1Have you had a confirmed dog rabies case in this household**

- ☐ yes
- ☐ no

**P2How was the case confirmed**

- ☐ laboratory
- ☐ head of community
- ☐ veterinary officer
- ☐ medical doctor
- ☐ herbalist
- ☐ other

**P3How long ago did you get the dog case in months**

---

**P4Have you had a confirmed human case in this household**

- ☐ yes
- ☐ no

**P4 If yes, what was the sex of the victim**

- ☐ Female
- ☐ Male

**P5 What was the age of the victim**

---

**P6 How was the human case confirmed**

- ☐ laboratory
- ☐ head of community
- ☐ veterinary officer
- ☐ medical doctor
- ☐ herbalist
- ☐ other

**P7Was there any human death due to rabies in this household**

- ☐ yes
- ☐ no

**P8How long ago did you confirm human deaths in months**

---

**P9Have you had a confirmed livestock case in this household**

- ☐ yes
- ☐ no

**P10How was the case confirmed**

- ☐ laboratory
- ☐ head of community
- ☐ veterinary officer
- ☐ medical doctor
- ☐ herbalist
- ☐ other

**P11How long ago did you confirm live stock case in months**

---

**P12Which domestic animals did you confirm in this household/village**

- ☐ cattle
- ☐ sheep
- ☐ goat
- ☐ other

**p13.1If other domestic animals, specify**

---

**P14Have you had confirmed a wild animal rabies case in this community**

- ☐ yes
- ☐ no

**P15How was the case confirmed**

- ☐ laboratory
- ☐ head of community
- ☐ veterinary officer
- ☐ medical doctor
- ☐ herbalist
- ☐ other

**P16 Which wild animals did you confirm in this household/village**

- ☐ foxes
- ☐ monkeys
- ☐ bats
- ☐ wild dogs
- ☐ jackals
- ☐ other

**P17 other , specify**

---

**P18 Have you had any confirmed human case due to rabies in this community**

- ☐ yes
- ☐ no

**P19 Have you had any confirmed human death due to rabies in this community**

- ☐ Yes
- ☐ No

**P20 Have you had any confirmed dog case due to rabies in this community**

- ☐ yes
- ☐ no

**P21 Have you had any confirmed dog death due to rabies in this community**

- ☐ Yes
- ☐ No

**P22 Have you found foxes or wild dogs or skunks or raccoons dead in this community**

- ☐ yes
- ☐ no

**P23 if yes to dead foxes/wild dogs, how long time ago in months**

---

**Knowledge about Rabies Prevention and Control****k1 Have you heard about of a disease called rabies ?**

- ☐ yes
- ☐ no
- ☐ never

**k2 What are the main reservoirs of rabies?**

- ☐ dogs
- ☐ foxes
- ☐ cats
- ☐ racoons
- ☐ I dont know

**k3 What is the commonest reservoir of rabies in your area?**

- ☐ dogs
- ☐ foxes
- ☐ cats
- ☐ racoons
- ☐ I dont know

**k4 The most species affected by rabies are?**

- ☐ dogs
- ☐ man
- ☐ foxes
- ☐ livestock
- ☐ I dont know

**k5 The common mode of rabies transmission is rabid dog, cat, or fox biting a human being**

- ☐ no
- ☐ yes
- ☐ I dont know

**k6 What is the most prone category of people to rabies**

- ☐ children 1-15yrs
- ☐ women
- ☐ men
- ☐ I don't know

**k7 Incubation period of rabies in animals is**

- ☐ less than 3weeks
- ☐ 3weeks-12weeks
- ☐ beyond 12weeks but upto a year
- ☐ I dont know

**» Signs and symptoms in animals****» » Furious form****ss1**The rabid dog becomes aggressive and excitable

- ☐ no
- ☐ yes
- ☐ I dont know

**» » Dumb form****ss2**The rabid dog becomes paralytic

- ☐ no
- ☐ yes
- ☐ I dont know

**ss3** There is difficult in swallowing i.e like it has swallowed a bone

- ☐ no
- ☐ yes
- ☐ I dont know

**ss4**what is the most common period of communicability in dogs/cats

- ☐ 3-5 days
- ☐ 14 days
- ☐ 21-90 days
- ☐ I don't know

**ss5** What is the typical incubation period in humans

- ☐ 2-10 days
- ☐ 2-3 months
- ☐ 1 week - 1 year
- ☐ I don't know

**» Signs and symptoms in humans****» » Early signs****ssh1** Symptoms of flue

- ☐ no
- ☐ yes
- ☐ I dont know

**» » Mid-term signs (cerebral disfunction)****ssh2 Confusion, agitation, anxiety**

- ☐ no
- ☐ yes
- ☐ I dont know

**» » Adadvanced stage signs****ssh3 Anormal behaviour like: Delirium, hallucinations, hydrophobia, insomnia**

- ☐ no
- ☐ yes
- ☐ I dont know

**» Primary preventive measures****» » For dogs(pd)****pd1 visiting veterinary doctor regulary**

- ☐ no
- ☐ yes
- ☐ I dont know

**pd2 Vaccinate dogs annually**

- ☐ no
- ☐ yes
- ☐ I dont know

**pd3 control straying dogs**

- ☐ no
- ☐ yes
- ☐ I dont know

**pd4 Stop allowing dogs to go to national park**

- ☐ no
- ☐ yes
- ☐ I dont know

**pd5 stop grazing in national parks**

- ☐ no
- ☐ yes
- ☐ I dont know

**» » For people (pp)****pp1Don` t get in contact with wild life**

- ☐ no
- ☐ yes
- ☐ I dont know

**pp2Dont get in contact with bats**

- ☐ no
- ☐ yes
- ☐ I dont know

**» Secondary prevention (post exposure)****» » For dogs: (sp)****sp1wash animal wound with water and soap**

- ☐ no
- ☐ yes
- ☐ I dont know

**» » For people:****sp2PEP with Human Rabies Immune Globulin(HRIG) at 0 day of exposure**

- ☐ no
- ☐ yes
- ☐ I dont know

**sp3Pre-exposure vaccination for at risk people**

- ☐ no
- ☐ yes
- ☐ I dont know

**sp4Gentle wash/irrigation of wound in water**

- ☐ no
- ☐ yes
- ☐ I dont know

**sp5Wash wound with diluted povidone-iodine**

- ☐ no
- ☐ yes
- ☐ I dont know

## C Attitude about Rabies Prevention and Control

**c1Think that rabies is caused by wild life livestock human interaction**

- ☐ agree
- ☐ not sure
- ☐ disagree

**c2believe that rabies is a huge burden in uganda**

- ☐ agree
- ☐ not sure
- ☐ disagree

**c3think that rabies affects warm blooded animals**

- ☐ agree
- ☐ not sure
- ☐ disagree

**c4Believe that rabies affects wild animals and human beings**

- ☐ agree
- ☐ not sure
- ☐ disagree

**c5think that hunting dogs are more likely to transmit rabies**

- ☐ agree
- ☐ not sure
- ☐ disagree

**c6Believe that bats transmit rabies**

- ☐ agree
- ☐ not sure
- ☐ disagree

**c7think that rabies can be transmitted through aerosols**

- ☐ agree
- ☐ not sure
- ☐ disagree

**c8Think that a person bitten by a rabid dog should seek treatment from a health facility/veterinary facility**

- ☐ agree
- ☐ not sure
- ☐ disagree

**c9Believe that communities are willing to vaccinate their pets/dogs**

- ☐ agree
- ☐ not sure
- ☐ disagree

**c10do you think vaccination of dogs/pets greatly contributes to rabies control in your district**

- ☐ agree
- ☐ not sure
- ☐ disagree

**c11Believe that community sensitization has not been sufficiently done in our community**

- ☐ agree
- ☐ not sure
- ☐ disagree

**c12Believe that health centres should work closely with veterinary office to curb down rabies**

- ☐ agree
- ☐ not sure
- ☐ disagree

**P Practices on the risk of Rabies transmission****P1 How often do you graze your animals in game reserves or national park**

- ☐ always
- ☐ 3 times a week
- ☐ less than 3 times a week
- ☐ never

**P2 How often do you graze your animals with dogs**

- ☐ Always
- ☐ 3 times a week
- ☐ less than 3 times a week
- ☐ Never

**» Grazing system used****p3The grazing system used in this community/household**

- ☐ free range
- ☐ tethering
- ☐ paddock
- ☐ strip
- ☐ other

**p4if other grazing system, specify**

---

**p5 Do your animals graze on their own**

- ☐ Always
- ☐ 3 times a week
- ☐ less than 3 times a week
- ☐ never

**p6How often do you vaccinate your dogs**

- ☐ 3 months
- ☐ Annually
- ☐ Never

**P7 How are your dogs kept**

- ☐ Chained
- ☐ Caged
- ☐ Free roaming

**P8How often do your dogs hunt in the game reserve or national park**

- ☐ Always
- ☐ 3 times a week
- ☐ less than 3times a week
- ☐ never

**P9How often do you see poachers in this game reserve**

- ☐ Always
- ☐ 3 times aweek
- ☐ less than 3times a week
- ☐ never

**P10 Are there any wild life attacks in your community**

- ☐ Yes
- ☐ No

**P11 If yes, what wild lives attack in the community**

- ☐ Foxes
- ☐ Wild dogs
- ☐ wild cats
- ☐ Cheeter
- ☐ lions
- ☐ other

**P12 If other specify**

---

**P13 How often do you vaccinate children against rabies in this community**

- ☐ Annualy
- ☐ 3 times a year
- ☐ never

**P14 How often do you fetch water in the game reserve or national park**

- ☐ Always
- ☐ 3 times a week
- ☐ less than 3 times a week
- ☐ never

**P15 How often do you fetch firewood in the game reserve or national park**

- ☐ Always
- ☐ 3 times a week
- ☐ less than 3 times a week
- ☐ never

**Photo**

Click here to upload file. (< 5MB)

**Summarize the key highlights about rabies you have captured from participant**

---

GPS

latitude (x.y °)

longitude (x.y °)

altitude (m)

accuracy (m)

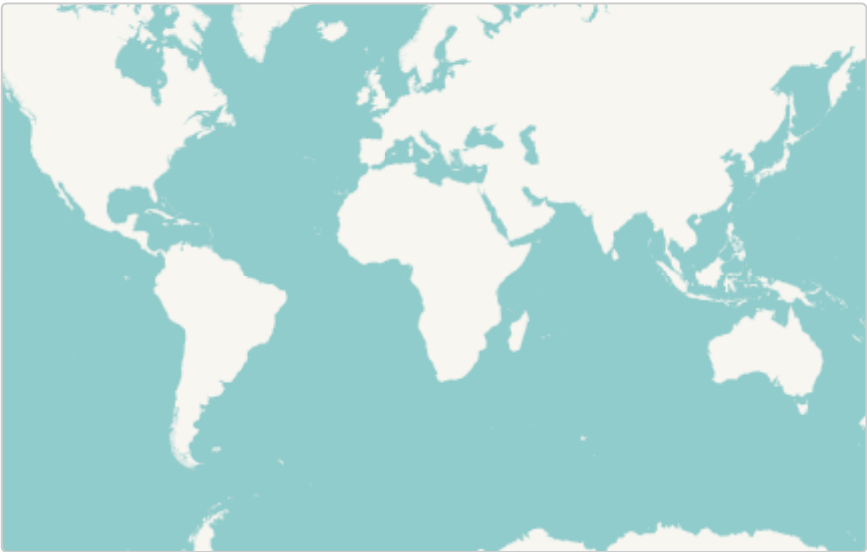

Supplement: Data_Sheet_1.PDF [file Data_Sheet_1.PDF]
